# Supplementary material for: Design of hepadnavirus core protein-based chimeric virus-like particles carrying epitopes from respiratory syncytial virus
Source: PubMed Central journal article supplement (PMC10951352; doi:10.1038/s41541-024-00855-7), 2024-03-19
Supplement: 41541_2024_855_MOESM1_ESM.pdf [file 41541_2024_855_MOESM1_ESM.pdf]

## Supplementary Material

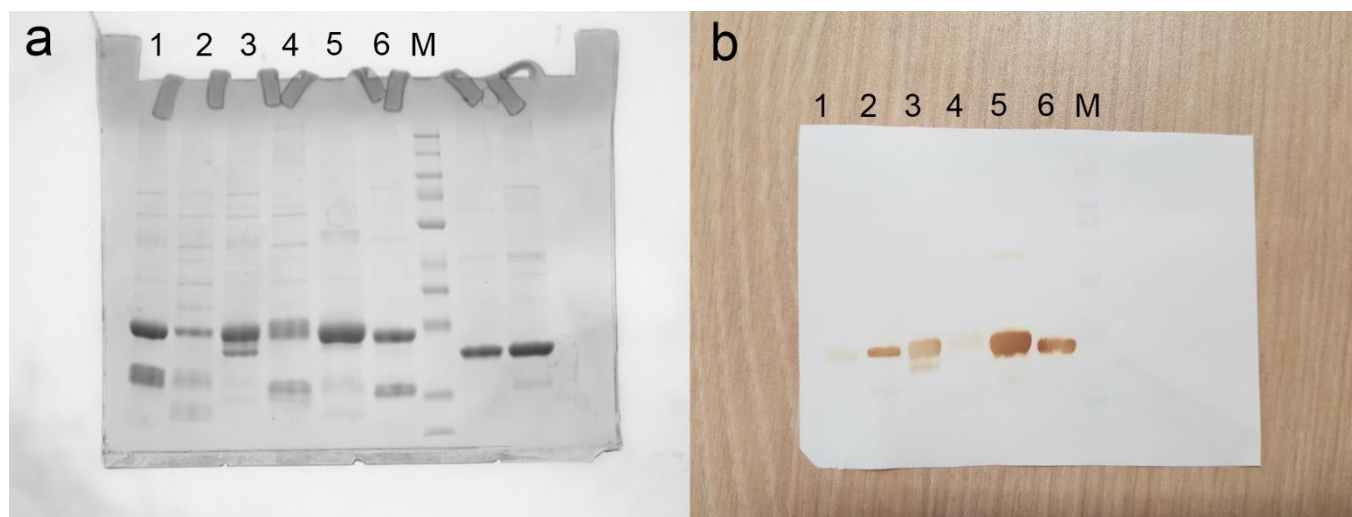

**Supplementary Figure 1. The uncropped and unprocessed gel images and blots.** **a** The uncropped and unprocessed SDS-PAGE image for Figure 2a in the main text. **b** The uncropped and unprocessed Western-blot for Figure 2b in the main text. Lane 1: BTHcAg\_MIR-II, Lane 2: AGSHcAg\_MIR-II, Lane 3: WHcAg\_MIR-II, Lane 4: HBcAg\_MIR-II, Lane 5: GSHcAg\_MIR-II, Lane 6: RBHcAg\_MIR-II, Lane M: Protein molecular weight marker.

**Supplementary Table 1. OD<sub>450/630nm</sub> values for the binding of the designed chimeric VLPs at different concentrations to palivizumab detected by ELISA. Three repeated measurements were performed.**

| VLP concentration<br>(ng/ml) | RBHcAg_MIR-II |       |       | BTHcAg_MIR-II |       |       | AGSHcAg_MIR-II |       |       | GSHcAg_MIR-II |       |       | WHcAg_MIR-II |       |       | HBcAg_MIR-II |       |       | Native F |       |       |
|------------------------------|---------------|-------|-------|---------------|-------|-------|----------------|-------|-------|---------------|-------|-------|--------------|-------|-------|--------------|-------|-------|----------|-------|-------|
| 1000                         | 2.179         | 2.22  | 2.276 | 2.137         | 2.143 | 2.217 | 2.112          | 2.11  | 2.12  | 2.261         | 2.209 | 2.274 | 2.197        | 2.146 | 2.149 | 2.183        | 2.112 | 2.14  | 2.076    | 2.199 | 2.029 |
| 500                          | 2.106         | 2.109 | 2.118 | 2.141         | 2.128 | 2.093 | 2.09           | 2.058 | 1.957 | 2.152         | 2.23  | 2.109 | 2.1          | 2.154 | 2.092 | 1.94         | 1.902 | 1.957 | 1.861    | 1.976 | 1.787 |
| 250                          | 2.039         | 1.952 | 2.104 | 2.034         | 1.972 | 2.004 | 1.924          | 1.736 | 1.781 | 2.027         | 2.026 | 2.072 | 1.969        | 1.981 | 1.984 | 1.692        | 1.652 | 1.628 | 1.498    | 1.571 | 1.282 |
| 125                          | 1.84          | 1.867 | 1.804 | 1.926         | 1.929 | 1.884 | 1.516          | 1.493 | 1.462 | 2.004         | 1.923 | 1.983 | 1.815        | 1.762 | 1.737 | 1.531        | 1.471 | 1.388 | 1.135    | 1.085 | 0.879 |
| 62.5                         | 1.535         | 1.472 | 1.567 | 1.649         | 1.637 | 1.614 | 1.051          | 0.957 | 1.004 | 1.645         | 1.612 | 1.606 | 1.41         | 1.358 | 1.331 | 1.101        | 0.857 | 0.898 | 0.685    | 0.599 | 0.437 |
| 31.25                        | 1.188         | 1.008 | 1.068 | 1.343         | 1.21  | 1.226 | 0.624          | 0.586 | 0.597 | 1.31          | 1.266 | 1.175 | 0.978        | 1.106 | 0.928 | 0.64         | 0.595 | 0.524 | 0.399    | 0.35  | 0.254 |
| 15.625                       | 0.761         | 0.699 | 0.661 | 0.872         | 0.797 | 0.749 | 0.321          | 0.29  | 0.275 | 0.806         | 0.782 | 0.758 | 0.569        | 0.513 | 0.492 | 0.338        | 0.345 | 0.282 | 0.19     | 0.199 | 0.127 |
| 7.8125                       | 0.369         | 0.348 | 0.333 | 0.492         | 0.435 | 0.403 | 0.151          | 0.129 | 0.128 | 0.47          | 0.414 | 0.382 | 0.302        | 0.262 | 0.268 | 0.181        | 0.147 | 0.14  | 0.111    | 0.102 | 0.079 |
| 3.90625                      | 0.208         | 0.196 | 0.156 | 0.26          | 0.248 | 0.192 | 0.091          | 0.081 | 0.065 | 0.236         | 0.229 | 0.193 | 0.159        | 0.156 | 0.146 | 0.092        | 0.081 | 0.07  | 0.059    | 0.049 | 0.038 |
| 1.953125                     | 0.106         | 0.098 | 0.072 | 0.137         | 0.129 | 0.097 | 0.042          | 0.045 | 0.035 | 0.121         | 0.132 | 0.099 | 0.08         | 0.07  | 0.073 | 0.05         | 0.042 | 0.036 | 0.033    | 0.03  | 0.022 |
| 0.9765625                    | 0.05          | 0.064 | 0.041 | 0.066         | 0.069 | 0.05  | 0.022          | 0.029 | 0.02  | 0.062         | 0.077 | 0.051 | 0.043        | 0.045 | 0.039 | 0.026        | 0.029 | 0.026 | 0.02     | 0.021 | 0.016 |

**Supplementary Table 2. Data for the competitive palivizumab-binding abilities of the designed chimeric VLPs in contrast with the native RSV F protein tested using ELISA (%inhibition). Three repeated measurements were performed.**

| VLP concentration (ng/well) | RBHcAg_MIR-II |        |        | BTHcAg_MIR-II |        |        | AGSHcAg_MIR-II |        |        | GSHcAg_MIR-II |        |        | WHcAg_MIR-II |        |        | HBcAg_MIR-II |        |        |
|-----------------------------|---------------|--------|--------|---------------|--------|--------|----------------|--------|--------|---------------|--------|--------|--------------|--------|--------|--------------|--------|--------|
|                             |               |        |        |               |        |        |                |        |        |               |        |        |              |        |        |              |        |        |
| 1000                        | 91.532        | 92.201 | 90.949 | 92.808        | 94.919 | 94.127 | 76.323         | 77.349 | 74.739 | 87.953        | 88.653 | 80.185 | 70.274       | 83.635 | 82.408 | 18.948       | 16.257 | 13.861 |
| 500                         | 91.679        | 90.354 | 92.228 | 89.291        | 92.276 | 90.756 | 70.404         | 70.699 | 67.223 | 83.209        | 84.974 | 78.043 | 68.678       | 76.097 | 69.189 | 6.129        | 7.893  | 8.550  |
| 250                         | 90.994        | 87.943 | 87.752 | 85.083        | 87.652 | 86.786 | 60.298         | 62.361 | 59.603 | 77.719        | 78.238 | 67.868 | 55.611       | 55.391 | 56.806 | 5.873        | 5.123  | 3.452  |
| 125                         | 87.518        | 87.122 | 85.047 | 81.140        | 82.571 | 80.750 | 50.914         | 50.072 | 45.355 | 60.821        | 66.995 | 56.378 | 39.052       | 36.116 | 36.855 | -0.715       | 0.680  | 2.337  |
| 62.5                        | 84.043        | 84.813 | 82.243 | 71.444        | 72.967 | 70.799 | 34.360         | 30.651 | 19.468 | 52.399        | 54.249 | 40.896 | 15.960       | 18.941 | 20.197 | 3.320        | 0.784  | -1.859 |
| 31.25                       | 82.085        | 81.375 | 74.816 | 48.002        | 57.622 | 54.377 | 23.917         | 21.976 | 15.292 | 28.571        | 31.088 | 25.122 | 9.426        | 5.964  | 10.123 | -0.562       | -1.882 | -1.221 |
| 15.625                      | 65.884        | 63.212 | 64.142 | 33.777        | 43.852 | 34.095 | 3.609          | 9.060  | -4.697 | 16.951        | 18.135 | 7.157  | -1.097       | 4.723  | 8.501  | -0.409       | -0.261 | -4.886 |
| 7.8125                      | 51.346        | 39.610 | 47.860 | 20.671        | 25.762 | 13.812 | 5.438          | 9.349  | -5.793 | 4.797         | 4.456  | 3.262  | -0.449       | -0.620 | 3.931  | 2.809        | -3.293 | -3.877 |
| 3.90625                     | 21.586        | 14.007 | 18.642 | 3.889         | 9.350  | 4.785  | 2.984          | 8.771  | -5.115 | 4.371         | 4.404  | -0.097 | 0.449        | 4.771  | 10.074 | 1.992        | 0.261  | -2.602 |
| 1.953125                    | 10.328        | 4.002  | 8.165  | 7.405         | 2.896  | -3.861 | -0.674         | 10.458 | -4.175 | 2.612         | 6.321  | -2.240 | 1.297        | 5.677  | 6.486  | 0.613        | -0.418 | -5.151 |
| 0.9765625                   | 8.811         | 3.438  | 8.116  | 3.197         | 4.167  | -0.109 | 7.748          | 11.229 | -3.288 | 2.878         | 5.959  | 3.797  | 4.439        | 1.002  | 6.241  | 3.626        | 0.314  | -2.655 |

**Supplementary Table 3. Individual data of the live-virus neutralizing antibody titers in the serum of the mice immunized with different chimeric VLPs that display the RSV F epitope II.**

| Design schemes | Mouse 1 | Mouse 2 | Mouse 3 | Mouse 4 | Mouse 5 | Mouse 6 | Mouse 7 | Mouse 8 | GMT      |
|----------------|---------|---------|---------|---------|---------|---------|---------|---------|----------|
| RBHcAg_MIR-II  | 1024    | 2048    | 128     | 64      | 128     | 64      | 512     | 64      | 215.2695 |
| BTHcAg_MIR-II  | 16      | 16      | 16      | 16      | 16      | 32      | 32      | 1024    | 32       |
| AGSHcAg_MIR-II | 32      | 32      | 32      | 32      | 128     | 128     | 32      | 4096    | 82.99773 |
| GSHcAg_MIR-II  | 64      | 16      | 32      | 64      | 512     | 32      | 32      | 64      | 53.81737 |
| WHcAg_MIR-II   | 32      | 16      | 64      | 16      | 64      | 256     | 64      | 32      | 45.25483 |
| HBcAg_MIR-II   | 16      | 32      | 16      | 64      | 16      | 32      | 64      | 16      | 26.90869 |
| Adjuvant       | 16      | 8       | 16      | 8       | 8       | 8       | 16      | 8       | 10.37472 |

Note: The quantification limit of the live-virus neutralization assay was 16, and the titer value below the limit of detection (LOD) was set to 8.

**Supplementary Table 4. Individual data of live-virus neutralizing antibody titers in the mice elicited by different chimeric VLPs harboring multiple RSV F neutralizing epitopes.**

| Design schemes        | Mouse 1 | Mouse 2 | Mouse 3 | Mouse 4 | Mouse 5 | Mouse 6 | Mouse 7 | Mouse 8 | GMT      |
|-----------------------|---------|---------|---------|---------|---------|---------|---------|---------|----------|
| RBHcAg_MIR-II_NC-VIII | 256     | 512     | 8192    | 2048    | 1024    | 256     | 2048    | 128     | 789.6119 |
| RBHcAg_MIR-II_NC-II   | 1024    | 2048    | 2048    | 4096    | 1024    | 256     | 4096    | 128     | 1116.68  |
| RBHcAg_MIR-II_C-II    | 128     | 64      | 1024    | 4096    | 256     | 512     | 512     | 128     | 362.0387 |
| RBHcAg_MIR-II_N-II    | 16      | 16      | 32      | 32      | 16      | 16      | 32      | 32      | 22.62742 |
| RBHcAg_MIR-II         | 1024    | 2048    | 128     | 64      | 128     | 64      | 512     | 64      | 215.2695 |

Note: The quantification limit of the live-virus neutralization assay was 16.

**Supplementary Table 5. Individual data for the IgG1 and IgG2a antibody titers induced by RBHcAg\_MIR-II\_NC-VIII in comparison to those induced by FI-RSV.**

| Design schemes        | IgG2a   |         |         |         |         |         |         |         | IgG1    |         |         |         |         |         |         |         |
|-----------------------|---------|---------|---------|---------|---------|---------|---------|---------|---------|---------|---------|---------|---------|---------|---------|---------|
|                       | Mouse 1 | Mouse 2 | Mouse 3 | Mouse 4 | Mouse 5 | Mouse 6 | Mouse 7 | Mouse 8 | Mouse 1 | Mouse 2 | Mouse 3 | Mouse 4 | Mouse 5 | Mouse 6 | Mouse 7 | Mouse 8 |
| RBHcAg_MIR-II_NC-VIII | 2700    | 2700    | 900     | 900     | 300     | 900     | 2700    | 8100    | 8100    | 900     | 2700    | 900     | 72900   | 8100    | 2700    | 2700    |
| FI-RSV                | 2700    | 24300   | 300     | 50      | 300     | 100     | /       | /       | 24300   | 2700    | 8100    | 24300   | 8100    | 24300   | /       | /       |
| PBS                   | 50      | 50      | 50      | 50      | 50      | 50      | 50      | 50      | 50      | 50      | 50      | 50      | 50      | 50      | 50      | 50      |

Note: "/" means that the mouse died. The quantification limit of the assay was 100, and the titer value below the limit of detection (LOD) was set to 50.

**Supplementary Table 6. Individual data for the IL-4 secretion levels in the splenic lymphocytes of the mice immunized with RBHcAg\_MIR-II\_NC-VIII in comparison to those immunized with FI-RSV (pg/10<sup>6</sup> cells).**

|                       | Mouse 1  | Mouse 2  | Mouse 3  | Mouse 4  |
|-----------------------|----------|----------|----------|----------|
| RBHcAg_MIR-II_NC-VIII | 51.00671 | 38.74233 | 21.66667 | 59.55056 |
| FI-RSV                | 54.81865 | 0        | 0        | 69.0625  |
| PBS                   | 4.603175 | 4.987179 | 6.3      | 1.530287 |

**Supplementary Table 7. Individual data for the IFN- $\gamma$  secretion levels in the splenic lymphocytes of the mice immunized with RBHcAg\_MIR-II\_NC-VIII in comparison to those immunized with FI-RSV (pg/10<sup>6</sup> cells).**

|                       | Mouse 1  | Mouse 2  | Mouse 3  | Mouse 4  |
|-----------------------|----------|----------|----------|----------|
| RBHcAg_MIR-II_NC-VIII | 677.5503 | 255.8896 | 170.1366 | 720.2247 |
| FI-RSV                | 75.12953 | 0        | 58.21826 | 0        |
| PBS                   | 11.26984 | 5.948718 | 19.03333 | 2.274176 |

**Supplementary Table 8. Individual data for the body weight changes of the mice from different groups after live-virus challenge. The unit of body weight is g.**

|               |       | Mouse 1 | Mouse 2 | Mouse 3 | Mouse 4 | Mouse 5 | Mouse 6 | Mouse 7 | Mouse 8 |
|---------------|-------|---------|---------|---------|---------|---------|---------|---------|---------|
| Vaccine group | Day 0 | 26.94   | 24.74   | 23.52   | 20.35   | 25.14   | 24.14   | 20.72   | 23.69   |
|               | Day 1 | 20.26   | 23.11   | 25.69   | 19.8    | 26.01   | 23.6    | 23.43   | 24.56   |
|               | Day 2 | 24.07   | 22.7    | 19.91   | 19.87   | 25.48   | 22.68   | 25.56   | 24.08   |
|               | Day 3 | 21.59   | 24.65   | 20.68   | 24.01   | 25.37   | 25.91   | 26.11   | 23.84   |
|               | Day 4 | 24.12   | 20.3    | 21.41   | 25.96   | 24.84   | 25.6    | 23.82   | 25.88   |
|               | Day 5 | 20.77   | 25      | 21.69   | 26.9    | 23.95   | 26.51   | 25.35   | 26.28   |
| PBS group     | Day 0 | 23.25   | 23.42   | 23.77   | 23.52   | 23.34   | 22.73   | 24.31   | 24.43   |
|               | Day 1 | 22.89   | 21.3    | 22.02   | 23.75   | 21.91   | 21.91   | 21.12   | /       |
|               | Day 2 | 22.71   | 23.7    | 22.24   | 21.55   | 23.04   | 22.13   | 21.54   | /       |
|               | Day 3 | 23.21   | 24.56   | 23.59   | 21.93   | 21.93   | 24.38   | 22.23   | /       |
|               | Day 4 | 23.99   | 24.2    | 23.24   | 22.3    | 21.98   | 23.84   | 22.25   | /       |
|               | Day 5 | 23.2    | 24      | 23.93   | 22.18   | 22      | 22.68   | 23.99   | /       |
| Control group | Day 0 | 24.32   | 24.26   | 25.17   | 23.35   |         |         |         |         |
|               | Day 1 | 24.29   | 23.67   | 23.16   | 23.32   |         |         |         |         |
|               | Day 2 | 23.17   | 24.03   | 23.95   | 23.79   |         |         |         |         |
|               | Day 3 | 24.74   | 24.32   | 24.38   | 24.23   |         |         |         |         |
|               | Day 4 | 24.46   | 24.69   | 23.79   | 23.75   |         |         |         |         |
|               | Day 5 | 23.83   | 24.2    | 24.96   | 24.75   |         |         |         |         |

Note: "/" means that the mouse died during the live-virus challenge experiment.

**Supplementary Table 9. Individual data for the viral loads in the lung tissues of the mice from different groups. The viral loads were calculated by the comparative cycle threshold (Ct) method using the expression level of the GAPDH gene as the calibrator. Detection results were reported as the fold changes of the viral loads in comparison to the mean value of the vaccine group.**

|               | Mouse 1 | Mouse 2 | Mouse 3 | Mouse 4 | Mouse 5 |
|---------------|---------|---------|---------|---------|---------|
| Vaccine group | 0.11682 | 0.00020 | 0.05150 | 0.00022 | 0.01032 |
| PBS group     | 1.19425 | 1.20948 | 1.14131 | 0.45496 | /       |
| Control       | 0.00052 | 0.00042 | 0.00044 | /       | /       |

Note: "/" means no mouse.
